# Supplementary material
Source: MDPI journal article supplement (https://www.mdpi.com/2311-7524/8/12/1160)
Supplement: s1 [file s1]

Table S1 Values of crop height, LAI, SPAD, SLA, number of pods and grain yield and Tukey's HSD letters

| TRT | Shade depth<br>% (SD) | Height<br>(cm) | LAI<br>(m <sup>2</sup> m <sup>-2</sup> ) | SPAD     | SLA<br>(cm <sup>2</sup> g <sup>-1</sup> ) | Number<br>of pods m <sup>2</sup> | Grain yield<br>(g m <sup>-2</sup> ) |
|-----|-----------------------|----------------|------------------------------------------|----------|-------------------------------------------|----------------------------------|-------------------------------------|
| FL  | 0%                    | 87.80 bc       | 2.78 bc                                  | 43.58 a  | 197.93 ab                                 | 2461 a                           | 667.82 a                            |
| AV1 | 27%                   | 98.25 a        | 3.63 a                                   | 43.41 a  | 213.36 a                                  | 1983 a                           | 614.73 a                            |
| AV2 | 16%                   | 86.95 bc       | 3.08 ab                                  | 41.87 b  | 201.31 a                                  | 2379 a                           | 697.36 a                            |
| AV3 | 9%                    | 85.04 c        | 2.97 b                                   | 42.87 ab | 159.12 b                                  | 2177 a                           | 636.80 a                            |
| AV4 | 18%                   | 90.81 b        | 2.31 c                                   | 42.33 ab | 194.91 ab                                 | 2011 a                           | 588.81 a                            |

Table S2 The Two-way ANOVA table for Height.

|           | Df  | Sum Sq | Mean Sq | F-value | P-value  |
|-----------|-----|--------|---------|---------|----------|
| TRT       | 4   | 2642   | 660.4   | 19.71   | <2.2e-16 |
| Date      | 3   | 55944  | 18468   | 556.5   | <2.2e-16 |
| TRT: Date | 12  | 1917   | 159.76  | 4.76    | <2.2e-16 |
| Residuals | 121 | 4055   | 33.51   | -       | -        |

Table S3 The Two-way ANOVA table for SPAD.

|           | Df  | Sum Sq | Mean Sq | F-value | P-value  |
|-----------|-----|--------|---------|---------|----------|
| TRT       | 4   | 118.5  | 29.61   | 5.744   | 0.0002   |
| Date      | 5   | 4586   | 917.1   | 177.9   | <2.2e-16 |
| TRT: Date | 20  | 483.7  | 24.18   | 4.691   | <2.2e-16 |
| Residuals | 180 | 928    | 5.5155  | -       | -        |

Table S4 The Two-way ANOVA table for LAI.

|           | Df | Sum Sq | Mean Sq | F-value | P-value  |
|-----------|----|--------|---------|---------|----------|
| TRT       | 4  | 5.67   | 1.418   | 13.33   | <2.2e-16 |
| Date      | 2  | 171.9  | 85.93   | 808     | <2.2e-16 |
| TRT: Date | 8  | 6.138  | 0.7673  | 7.215   | 0.0002   |
| Residuals | 18 | 1.914  | 0.1063  | -       | -        |

Table S5 The Two-way ANOVA table for SLA.

|           | Df | Sum Sq | Mean Sq | F-value | P-value  |
|-----------|----|--------|---------|---------|----------|
| TRT       | 4  | 8061   | 2015    | 4.524   | 0.0085   |
| Date      | 1  | 10690  | 10690   | 24      | <2.2e-16 |
| TRT: Date | 3  | 244.1  | 81.36   | 0.1827  | 0.907    |
| Residuals | 21 | 9355   | 445.5   | -       | -        |

Table S6 One-way ANOVA for number of pods.

|                  | <b>Df</b> | <b>Sum Sq</b> | <b>Mean Sq</b> | <b>F-value</b> | <b>P-value</b> |
|------------------|-----------|---------------|----------------|----------------|----------------|
| <b>TRT</b>       | 4         | 479025        | 119756         | 2.307          | 0.1577         |
| <b>Residuals</b> | 7         | 363436        | 51919          | -              | -              |

Table S7 Summary of the standard deviation and standard error of pods number measured per each treatment. N= number of samplings per area

| <b>SD</b> | <b>TRT</b> | <b>N</b> | <b>Pods number<br/>per m2</b> | <b>sd</b> | <b>se</b> |
|-----------|------------|----------|-------------------------------|-----------|-----------|
| <b>0</b>  | FL         | 4        | 2461                          | 301.01    | 150.50    |
| <b>9</b>  | AV3        | 2        | 2177                          | 6.72      | 4.75      |
| <b>16</b> | AV2        | 2        | 2379                          | 193.70    | 136.96    |
| <b>18</b> | AV4        | 2        | 2011                          | 168.79    | 119.35    |
| <b>27</b> | AV1        | 2        | 1983                          | 159.82    | 113.01    |

Table S8 Summary of the standard deviation and standard error of grain yield measured per each treatment. N= number of samplings per area

| <b>SD</b> | <b>TRT</b> | <b>N</b> | <b>Grain<br/>yield<br/>g m<sup>-2</sup></b> | <b>sd</b> | <b>se</b> |
|-----------|------------|----------|---------------------------------------------|-----------|-----------|
| <b>0</b>  | FL         | 4        | 667                                         | 94.60     | 47.30     |
| <b>9</b>  | AV3        | 2        | 636                                         | 46.29     | 32.73     |
| <b>16</b> | AV2        | 2        | 697                                         | 56.62     | 40.04     |
| <b>18</b> | AV4        | 2        | 588                                         | 19.09     | 13.50     |
| <b>27</b> | AV1        | 2        | 614                                         | 63.17     | 44.67     |

Table S9 One-way ANOVA for grain yield.

|                  | <b>Df</b> | <b>Sum Sq</b> | <b>Mean Sq</b> | <b>F-value</b> | <b>P-value</b> |
|------------------|-----------|---------------|----------------|----------------|----------------|
| <b>TRT</b>       | 4         | 15822         | 3955           | 0.7574         | 0.5843         |
| <b>Residuals</b> | 7         | 36556         | 5222           | -              | -              |
